# Supplementary material for: Association Between Screen Time Exposure in Children at 1 Year of Age and Autism Spectrum Disorder at 3 Years of Age: The Japan Environment and Children’s Study
Source: PubMed Central journal article supplement (PMC8804971; doi:10.1001/jamapediatrics.2021.5778), 2022-01-31
Supplement: jamapediatr-e215778-s001.pdf [file jamapediatr-e215778-s001.pdf]

## Supplemental Online Content

Kushima M, Kojima R, Shinohara R, et al; the Japan Environment and Children's Study Group. Association between screen time exposure in children at 1 year of age and autism spectrum disorder at 3 years of age: the Japan Environment and Children's Study. *JAMA Pediatr*. Published online January 31, 2022. doi:10.1001/jamapediatrics.2021.5778

**eTable 1.** Association between ASD at 3 years of age and screen time, stratified by child's sex (excluding those who had at least one red flag on any of the five ASQ items)

**eTable 2.** Association between ASD at 3 years of age and screen time at 3, stratified by child's sex

**eTable 3.** Characteristics of the mother-child dyads

**eTable 4.** Cross-tabulation and results of the Jonckheere-Terpstra Test

**eTable 5.** Sensitivity analysis of unmeasured confounding

This supplemental material has been provided by the authors to give readers additional information about their work.

eTable 1. Association between ASD at 3 years of age and screen time, stratified by child's sex (excluding those who had at least one red flag on any of the five ASQ items)

| Variables                                  | ASD at 3 years of age |                     |                       |           |                     |                       |           |                     |                       |
|--------------------------------------------|-----------------------|---------------------|-----------------------|-----------|---------------------|-----------------------|-----------|---------------------|-----------------------|
|                                            | Total                 |                     |                       | Boys      |                     |                       | Girls     |                     |                       |
|                                            |                       | Model 1<br>(Crude)  | Model 2<br>(Adjusted) |           | Model 1<br>(Crude)  | Model 2<br>(Adjusted) |           | Model 1<br>(Crude)  | Model 2<br>(Adjusted) |
|                                            | n                     | ORs (95%CI)         | ORs (95%CI)           | n         | ORs (95%CI)         | ORs (95%CI)           | n         | ORs (95%CI)         | ORs (95%CI)           |
| Screen time at 1 years of age <sup>†</sup> |                       | (n = 57245)         | (n = 52710)           |           | (n = 28779)         | (n = 26472)           |           | (n = 28466)         | (n = 26238)           |
| No screen time                             | 6324                  | 1.00 (reference)    | 1.00 (reference)      | 3267      | 1.00 (reference)    | 1.00 (reference)      | 3057      | 1.00 (reference)    | 1.00 (reference)      |
| <1 h                                       | 2136<br>1             | 1.00 (0.51 to 1.96) | 1.04 (0.51 to 2.09)   | 1094<br>7 | 1.29 (0.57 to 2.94) | 1.38 (0.57 to 3.34)   | 1041<br>4 | 0.51 (0.15 to 1.74) | 0.52 (0.15 to 1.77)   |
| 1 – <2 h                                   | 1907<br>1             | 1.79 (0.94 to 3.42) | 1.70 (0.87 to 3.35)   | 9433<br>9 | 2.20 (0.99 to 4.88) | 2.34 (0.99 to 5.52)   | 9632      | 1.20 (0.40 to 3.61) | 0.92 (0.30 to 2.88)   |
| 2 – <4 h                                   | 1249<br>8             | 2.85 (1.50 to 5.42) | 2.78 (1.42 to 5.44)   | 6196      | 3.78 (1.71 to 8.35) | 3.87 (1.65 to 9.09)   | 6302      | 1.47 (0.47 to 4.55) | 1.39 (0.44 to 4.34)   |
| ≥4 h                                       | 3984                  | 2.80 (1.33 to 5.89) | 2.28 (1.03 to 5.06)   | 1979      | 3.42 (1.38 to 8.48) | 2.69 (0.99 to 7.34)   | 2005      | 1.92 (0.52 to 7.16) | 1.81 (0.48 to 6.86)   |
|                                            |                       |                     |                       |           |                     |                       |           |                     |                       |
| Screen time at 3 years of age <sup>†</sup> |                       | (n = 57532)         | (n = 52942)           |           | (n = 28909)         | (n = 26568)           |           | (n = 28623)         | (n = 26374)           |
| <1 h <sup>‡</sup>                          | 1477<br>4             | 1.00 (reference)    | 1.00 (reference)      | 7262      | 1.00 (reference)    | 1.00 (reference)      | 7512      | 1.00 (reference)    | 1.00 (reference)      |
| 1 – <2 h                                   | 2583<br>0             | 1.42 (0.94 to 2.16) | 1.33 (0.87 to 2.04)   | 1310<br>2 | 1.39 (0.86 to 2.23) | 1.31 (0.80 to 2.13)   | 1272<br>8 | 1.43 (0.59 to 3.46) | 1.32 (0.54 to 3.22)   |
| 2 – <4 h                                   | 1443<br>2             | 2.15 (1.40 to 3.30) | 1.90 (1.23 to 2.96)   | 7287      | 2.13 (1.31 to 3.46) | 1.96 (1.19 to 3.23)   | 7145      | 2.11 (0.85 to 5.22) | 1.64 (0.64 to 4.20)   |

|                                                                                                                                                                                                                                                                                                                                                                                                                                                                                                                                          |      |                     |                     |      |                     |                     |      |                      |                      |
|------------------------------------------------------------------------------------------------------------------------------------------------------------------------------------------------------------------------------------------------------------------------------------------------------------------------------------------------------------------------------------------------------------------------------------------------------------------------------------------------------------------------------------------|------|---------------------|---------------------|------|---------------------|---------------------|------|----------------------|----------------------|
| ≥4 h                                                                                                                                                                                                                                                                                                                                                                                                                                                                                                                                     | 2496 | 2.88 (1.55 to 5.33) | 2.42 (1.27 to 4.59) | 1258 | 2.42 (1.15 to 5.07) | 1.98 (0.91 to 4.35) | 1238 | 4.35 (1.38 to 13.72) | 3.69 (1.16 to 11.80) |
| <p>†Adjustment: Mothers' scores on the Bonding Scale and K6 scores when the child at 1 year of age, depression, anxiety disorders, integration disorders, other mental and neurological illnesses, mother's age at birth, and household income, scores on the 5 items of the ASQ-3 at 1 year of age.</p> <p>‡Since complete separation occurred, the reference value was set to less than one hour.</p> <p>ORs = Odds ratios; 95% CI = 95% confidence intervals; ASD: Autism spectrum disorder; ASQ-3: Ages and Stages Questionnaire</p> |      |                     |                     |      |                     |                     |      |                      |                      |

eTable 2. Association between ASD at 3 years of age and screen time at 3, stratified by child's sex

| Variables                                                                                                                                                                                                                                                                                                                                                                                                                                  | ASD at 3 years of age |                     |                       |       |                     |                       |       |                     |                       |
|--------------------------------------------------------------------------------------------------------------------------------------------------------------------------------------------------------------------------------------------------------------------------------------------------------------------------------------------------------------------------------------------------------------------------------------------|-----------------------|---------------------|-----------------------|-------|---------------------|-----------------------|-------|---------------------|-----------------------|
|                                                                                                                                                                                                                                                                                                                                                                                                                                            | Total                 |                     |                       | Boys  |                     |                       | Girls |                     |                       |
|                                                                                                                                                                                                                                                                                                                                                                                                                                            |                       | Model 1<br>(Crude)  | Model 2<br>(Adjusted) |       | Model 1<br>(Crude)  | Model 2<br>(Adjusted) |       | Model 1<br>(Crude)  | Model 2<br>(Adjusted) |
|                                                                                                                                                                                                                                                                                                                                                                                                                                            | n                     | ORs (95% CI)        | ORs (95% CI)          | n     | ORs (95% CI)        | ORs (95% CI)          | n     | ORs (95% CI)        | ORs (95% CI)          |
| Screen time at 3 years of age <sup>†</sup>                                                                                                                                                                                                                                                                                                                                                                                                 |                       | (n = 74554)         | (n = 61307)           |       | (n = 38116)         | (n = 31148)           |       | (n = 36438)         | (n = 30159)           |
| <1 h                                                                                                                                                                                                                                                                                                                                                                                                                                       | 19127                 | 1.00 (reference)    | 1.00 (reference)      | 9557  | 1.00 (reference)    | 1.00 (reference)      | 9570  | 1.00 (reference)    | 1.00 (reference)      |
| 1 – <2 h                                                                                                                                                                                                                                                                                                                                                                                                                                   | 33218                 | 1.22 (0.90 to 1.65) | 1.15 (0.83 to 1.60)   | 17084 | 1.25 (0.89 to 1.78) | 1.25 (0.86 to 1.83)   | 16134 | 1.04 (0.56 to 1.92) | 0.88 (0.46 to 1.69)   |
| 2 – <4 h                                                                                                                                                                                                                                                                                                                                                                                                                                   | 18829                 | 1.79 (1.31 to 2.45) | 1.49 (1.06 to 2.10)   | 9715  | 1.80 (1.26 to 2.59) | 1.60 (1.07 to 2.38)   | 9114  | 1.64 (0.88 to 3.08) | 1.17 (0.59 to 2.33)   |
| ≥4 h                                                                                                                                                                                                                                                                                                                                                                                                                                       | 3380                  | 2.57 (1.64 to 4.02) | 2.00 (1.21 to 3.30)   | 1760  | 2.14 (1.24 to 3.69) | 1.81 (0.98 to 3.32)   | 1620  | 3.71 (1.68 to 8.19) | 2.42 (0.97 to 6.01)   |
| <sup>†</sup> Adjustment: Mothers' scores on the Bonding Scale and K6 scores when the child at 1 year of age, depression, anxiety disorders, integration disorders, other mental and neurological illnesses, mother's age at birth, and household income, scores on the 5 items of the ASQ-3 at 1 year of age.<br>ORs = Odds ratios; 95% CI = 95% confidence intervals; ASD: Autism spectrum disorder; ASQ-3: Ages and Stages Questionnaire |                       |                     |                       |       |                     |                       |       |                     |                       |

| eTable 3. Characteristics of the mother–child dyads |                |             |                                                         |                                                     |                                    |                   |                       |                                     |                       |                  |
|-----------------------------------------------------|----------------|-------------|---------------------------------------------------------|-----------------------------------------------------|------------------------------------|-------------------|-----------------------|-------------------------------------|-----------------------|------------------|
| Variables                                           |                |             | Mother's Bonding score when her child was 1 year of age | Mother's K6 scores when her child was 1 year of age | Mother's history of mental illness |                   |                       |                                     | Mother's age at birth | Household income |
|                                                     |                |             |                                                         |                                                     | Depression                         | Anxiety disorders | Integration disorders | Other mental neurological illnesses |                       |                  |
|                                                     |                |             | Average/<br>Median<br>/ Max/<br>Standard deviation      | ≥ 5 points                                          | Yes                                | Yes               | Yes                   | Yes                                 | < 20 y                | < 2 million yen  |
|                                                     |                |             | n (%)                                                   | n (%)                                               | n (%)                              | n (%)             | n (%)                 | n (%)                               | n (%)                 | n (%)            |
| Screen time at 1 year of age                        | No screen time | (n = 8541)  | 1.6/ 1.0/ 0.0/ 2.2                                      | 1654 (9.9)                                          | 230 (9.5)                          | 247 (11.1)        | 10 (7.6)              | 90 (11.1)                           | 33 (5.7)              | 447 (11.0)       |
|                                                     | < 1 h          | (n = 27707) | 1.7/ 1.0/ 0.0/ 2.1                                      | 5473 (29.9)                                         | 699 (28.9)                         | 630 (28.1)        | 40 (30.3)             | 239 (29.6)                          | 165 (28.6)            | 1284 (31.6)      |
|                                                     | 1– < 2 h       | (n = 25027) | 2.0/ 1.0/ 0.0/ 2.2                                      | 5525 (30.2)                                         | 720 (29.8)                         | 689 (30.7)        | 35 (26.5)             | 223 (27.6)                          | 178 (30.9)            | 1115 (27.4)      |

|                                       |                   |             |                       |                |               |               |           |            |               |                |
|---------------------------------------|-------------------|-------------|-----------------------|----------------|---------------|---------------|-----------|------------|---------------|----------------|
|                                       | 2— < 4 h          | (n = 16560) | 2.2/ 2.0/<br>0.0/ 2.5 | 4143<br>(22.6) | 566<br>(23.4) | 516<br>(23.0) | 37 (28.0) | 183 (22.6) | 129<br>(22.4) | 871<br>(21.4)  |
|                                       | ≥ 4 h             | (n = 5402)  | 2.3/ 2.0/<br>0.0/ 2.5 | 1526 (8.3)     | 200 (8.3)     | 163 (7.3)     | 10 (7.6)  | 73 (9.0)   | 71 (12.3)     | 350 (8.6)      |
|                                       | Total             | (n = 83237) | 2.5/ 2.0/<br>0.0/ 2.7 | 18321          | 2415          | 2245          | 132       | 808        | 576           | 4067           |
| Screen<br>time at 3<br>year of<br>age | No screen<br>time | (n = 1253)  | 2.0/ 1.0/<br>0.0/ 2.4 | 1654 (9.9)     | 59 (2.8)      | 36 (1.9)      | 2 (1.9)   | 14 (2.0)   | 9 (2.2)       | 72 (2.1)       |
|                                       | < 1 h             | (n = 17874) | 1.8/ 1.0/<br>0.0/ 2.4 | 5473<br>(29.9) | 447<br>(21.3) | 427<br>(22.2) | 20 (18.5) | 159 (22.9) | 89 (21.3)     | 809<br>(23.6)  |
|                                       | 1— < 2 h          | (n = 33218) | 1.7/ 1.0/<br>0.0/ 2.2 | 5525<br>(30.2) | 873<br>(41.7) | 807<br>(42.0) | 49 (45.4) | 273 (39.3) | 191<br>(45.7) | 1485<br>(43.2) |
|                                       | 2— < 4 h          | (n = 18829) | 1.9/ 1.0/<br>0.0/ 2.2 | 4143<br>(22.6) | 571<br>(27.3) | 545<br>(28.3) | 28 (25.9) | 205 (29.5) | 88 (21.1)     | 865<br>(25.2)  |
|                                       | ≥ 4 h             | (n = 3380)  | 2.2/ 1.0/<br>0.0/ 2.4 | 1526 (8.3)     | 144 (6.9)     | 108 (5.6)     | 9 (8.3)   | 43 (6.2)   | 41 (9.8)      | 203 (5.9)      |
|                                       | Total             | (n = 74554) | 2.5/ 2.0/<br>0.0/ 2.7 | 18321          | 2094          | 1923          | 108       | 694        | 418           | 3434           |

eTable 4. Cross-tabulation and results of Jonckheere-Terpstra Test

| Variables |         |     | Screen time at 1 year of age |        |          |          |        |       |                   | Screen time at 3 years of age |        |          |          |       |       |                   | Child's sex |        |       |
|-----------|---------|-----|------------------------------|--------|----------|----------|--------|-------|-------------------|-------------------------------|--------|----------|----------|-------|-------|-------------------|-------------|--------|-------|
|           |         |     | No screen time               | < 1 h  | 1— < 2 h | 2— < 4 h | ≥ 4 h  | Total | P for trend test† | No screen time                | < 1 h  | 1— < 2 h | 2— < 4 h | ≥ 4 h | Total | P for trend test† | Girl        | Boy    | Total |
| Total     | ASD     | n   | 19                           | 73     | 99       | 104      | 33     | 328   | < 0.001           | 4                             | 58     | 131      | 109      | 28    | 330   | < 0.001           | 79          | 251    | 330   |
|           |         | (%) | (5.8)                        | (22.3) | (30.2)   | (31.7)   | (10.1) |       |                   | (1.2)                         | (17.6) | (39.7)   | (33.0)   | (8.5) |       |                   | (24.0)      | (76.0) |       |
|           | Non-ASD | n   | 7669                         | 24785  | 22099    | 14538    | 4760   | 73851 |                   | 1249                          | 17816  | 33087    | 18720    | 3352  | 74224 |                   | 36498       | 38018  | 74516 |
|           |         | (%) | (10.4)                       | (33.6) | (29.9)   | (19.7)   | (6.4)  |       |                   | (1.7)                         | (24.0) | (44.6)   | (25.2)   | (4.5) |       |                   | (49.0)      | (51.0) |       |
|           | Total   | n   | 7688                         | 24858  | 22198    | 14642    | 4793   | 74179 |                   | 1253                          | 17874  | 33218    | 18829    | 3380  | 74554 |                   | 36577       | 38269  | 74846 |
|           |         | (%) | (10.4)                       | (33.5) | (29.9)   | (19.7)   | (6.4)  |       |                   | (1.7)                         | (24.0) | (44.6)   | (25.3)   | (4.5) |       |                   | (49.0)      | (51.0) |       |
| Boy       | ASD     | n   | 13                           | 59     | 74       | 79       | 25     | 250   | < 0.001           | 3                             | 43     | 103      | 84       | 18    | 251   | < 0.001           |             |        |       |
|           |         | (%) | (5.2)                        | (23.6) | (29.6)   | (31.6)   | (10.0) |       |                   | (1.2)                         | (17.1) | (41.0)   | (33.5)   | (7.2) |       |                   |             |        |       |
|           | Non-ASD | n   | 4070                         | 12786  | 11126    | 7282     | 2413   | 37677 |                   | 637                           | 8874   | 16981    | 9631     | 1742  | 37865 |                   |             |        |       |

|                           |             |              |        |            |           |        |            |           |                |       |            |        |        |            |           |                |  |  |
|---------------------------|-------------|--------------|--------|------------|-----------|--------|------------|-----------|----------------|-------|------------|--------|--------|------------|-----------|----------------|--|--|
|                           |             | (<br>%)<br>) | (10.8) | (33<br>.9) | (29.5)    | (19.3) | (6.4<br>)  |           |                | (1.7) | (23<br>.4) | (44.8) | (25.4) | (4.6<br>)  |           |                |  |  |
|                           | Total       | n            | 4083   | 128<br>45  | 1120<br>0 | 7361   | 243<br>8   | 379<br>27 |                | 640   | 891<br>7   | 17084  | 9715   | 176<br>0   | 381<br>16 |                |  |  |
|                           |             | (<br>%)<br>) | (10.8) | (33<br>.9) | (29.5)    | (19.4) | (6.4<br>)  |           |                | (1.7) | (23<br>.4) | (44.8) | (25.5) | (4.6<br>)  |           |                |  |  |
| Gi<br>rl                  | ASD         | n            | 6      | 14         | 25        | 25     | 8          | 78        | <<br>0.00<br>1 | 1     | 15         | 28     | 25     | 10         | 79        | <<br>0.00<br>1 |  |  |
|                           |             | (<br>%)<br>) | (7.7)  | (17<br>.9) | (32.1)    | (32.1) | (10.<br>3) |           |                | (1.3) | (19<br>.0) | (35.4) | (31.6) | (12.<br>7) |           |                |  |  |
|                           | Non-<br>ASD | n            | 3599   | 119<br>99  | 1097<br>3 | 7256   | 234<br>7   | 361<br>74 |                | 612   | 894<br>2   | 16106  | 9089   | 161<br>0   | 363<br>59 |                |  |  |
|                           |             | (<br>%)<br>) | (9.9)  | (33<br>.2) | (30.3)    | (20.1) | (6.5<br>)  |           |                | (1.7) | (24<br>.6) | (44.3) | (25.0) | (4.4<br>)  |           |                |  |  |
|                           | Total       | n            | 3605   | 120<br>13  | 1099<br>8 | 7281   | 235<br>5   | 362<br>52 |                | 613   | 895<br>7   | 16134  | 9114   | 162<br>0   | 364<br>38 |                |  |  |
|                           |             | (<br>%)<br>) | (9.9)  | (33<br>.1) | (30.3)    | (20.1) | (6.5<br>)  |           |                | (1.7) | (24<br>.6) | (44.3) | (25.0) | (4.4<br>)  |           |                |  |  |
| †Jonckheere Terpstra test |             |              |        |            |           |        |            |           |                |       |            |        |        |            |           |                |  |  |



| eTable 5. Sensitivity analysis of unmeasured confounding                                                                                                                                                                                                                                          |                            |                                 |             |                            |                                 |             |                            |                                 |             |
|---------------------------------------------------------------------------------------------------------------------------------------------------------------------------------------------------------------------------------------------------------------------------------------------------|----------------------------|---------------------------------|-------------|----------------------------|---------------------------------|-------------|----------------------------|---------------------------------|-------------|
| Variables                                                                                                                                                                                                                                                                                         | Total                      |                                 |             | Boys                       |                                 |             | Girls                      |                                 |             |
|                                                                                                                                                                                                                                                                                                   | E-value for point estimate | E-value for confidence interval |             | E-value for point estimate | E-value for confidence interval |             | E-value for point estimate | E-value for confidence interval |             |
|                                                                                                                                                                                                                                                                                                   |                            | Lower limit                     | Upper limit |                            | Lower limit                     | Upper limit |                            | Lower limit                     | Upper limit |
| Screen time at 1 year of age†                                                                                                                                                                                                                                                                     |                            |                                 |             |                            |                                 |             |                            |                                 |             |
| No screen time                                                                                                                                                                                                                                                                                    |                            |                                 |             |                            |                                 |             |                            |                                 |             |
| < 1 h                                                                                                                                                                                                                                                                                             | 1.59                       | 11.98                           | 3.48        | 2.10                       | 2.17                            | 4.82        | 1.96                       | 6.87                            | 3.78        |
| 1— < 2 h                                                                                                                                                                                                                                                                                          | 3.02                       | 1.28                            | 5.65        | 3.74                       | 1.51                            | 7.75        | 1.88                       | 3.59                            | 6.38        |
| 2— < 4 h                                                                                                                                                                                                                                                                                          | 5.19                       | 2.75                            | 9.29        | 6.42                       | 3.06                            | 12.78       | 3.27                       | 2.12                            | 9.87        |
| ≧ 4 h                                                                                                                                                                                                                                                                                             | 4.72                       | 2.19                            | 9.29        | 5.49                       | 2.24                            | 12.16       | 3.72                       | 2.35                            | 13.26       |
| Screen time at 3 years of age†                                                                                                                                                                                                                                                                    |                            |                                 |             |                            |                                 |             |                            |                                 |             |
| No screen time                                                                                                                                                                                                                                                                                    |                            |                                 |             |                            |                                 |             |                            |                                 |             |
| < 1 h                                                                                                                                                                                                                                                                                             | 1.74                       | 4.70                            | 7.32        | 1.92                       | 5.91                            | 10.29       | 1.43                       | 13.77                           | 16.54       |
| 1— < 2 h                                                                                                                                                                                                                                                                                          | 2.10                       | 3.97                            | 8.23        | 2.58                       | 4.57                            | 12.56       | 1.25                       | 14.87                           | 13.96       |
| 2— < 4 h                                                                                                                                                                                                                                                                                          | 2.98                       | 2.97                            | 10.88       | 3.50                       | 2.84                            | 16.20       | 1.88                       | 11.24                           | 19.05       |
| ≧ 4 h                                                                                                                                                                                                                                                                                             | 4.23                       | 2.17                            | 15.66       | 4.05                       | 3.26                            | 19.87       | 4.72                       | 5.70                            | 43.47       |
| †Adjustment: Mothers' scores on the Bonding Scale and K6 scores when the child at 1 year of age, depression, anxiety disorders, integration disorders, other mental and neurological illnesses, mother's age at birth, and household income, scores on the 5 items of the ASQ-3 at 1 year of age. |                            |                                 |             |                            |                                 |             |                            |                                 |             |

|                                     |  |  |  |  |  |  |  |  |  |
|-------------------------------------|--|--|--|--|--|--|--|--|--|
| E-value = $OR + \sqrt{OR} (OR - 1)$ |  |  |  |  |  |  |  |  |  |
|-------------------------------------|--|--|--|--|--|--|--|--|--|
