# Supplementary material for: Association Between Screen Time Exposure in Children at 1 Year of Age and Autism Spectrum Disorder at 3 Years of Age: The Japan Environment and Children’s Study
Source: PubMed Central journal article supplement (PMC8804971; doi:10.1001/jamapediatrics.2021.5778), 2022-01-31
Supplement: jamapediatr-e215778-s002.pdf [file jamapediatr-e215778-s002.pdf]

\*Indicates required information. Only first name, last name, and suffix will appear in PubMed.

| <b>*Group Name(s): the Japan Environment and Children's Study (JECS) Group</b> |                   |                              |                  |                                                  |                                          |                                                         |                                                                                            |
|--------------------------------------------------------------------------------|-------------------|------------------------------|------------------|--------------------------------------------------|------------------------------------------|---------------------------------------------------------|--------------------------------------------------------------------------------------------|
| <b>*First Name and Middle Initial(s)</b>                                       | <b>*Last Name</b> | <b>*Suffix (eg, Jr, III)</b> | Academic Degrees | Institution                                      | Location (city, state/province, country) | Role or Contribution, eg, chair, principal investigator | Group (if more than 1 Group listed in the byline) and/or Subgroup (eg, Steering Committee) |
| Michihiro                                                                      | Kamijima          |                              | MD PhD           | Nagoya City University                           | Nagoya, Aichi, Japan                     | principal investigator                                  |                                                                                            |
| Shin                                                                           | Yamazaki          |                              | PhD              | National Institute for Environmental Studies     | Tsukuba, Ibaraki, Japan                  | Project design, data collection and review              |                                                                                            |
| Yukihiro                                                                       | Ohya              |                              | MD PhD           | National Center for Child Health and Development | Setagaya, Tokyo, Japan                   | Project design, data collection and review              |                                                                                            |
| Reiko                                                                          | Kishi             |                              | MD PhD           | Hokkaido University                              | Sapporo, Hokkaido, Japan                 | Project design, data collection and review              |                                                                                            |
| Nobuo                                                                          | Yaegashi          |                              | MD PhD           | Tohoku University                                | Sendai, Miyagi, Japan                    | Project design, data collection and review              |                                                                                            |
| Koichi                                                                         | Hashimoto         |                              | MD PhD           | Fukushima Medical University                     | Fukushima, Japan                         | Project design, data collection and review              |                                                                                            |
| Chisato                                                                        | Mori              |                              | MD PhD           | Chiba University                                 | Chiba, Japan                             | Project design, data collection and review              |                                                                                            |
| Shuichi                                                                        | Ito               |                              | MD PhD           | Yokohama City University                         | Yokohama, Kanagawa, Japan                | Project design, data collection and review              |                                                                                            |
| Zentaro                                                                        | Yamagata          |                              | MD PhD           | University of Yamanashi                          | Chuo, Yamanashi, Japan                   | Project design, data collection and review              |                                                                                            |
| Hidekuni                                                                       | Inadera           |                              | MD PhD           | University of Toyama                             | Toyama, Japan                            | Project design, data collection and review              |                                                                                            |

## Supplemental Online Content: Nonauthor Collaborators

\*Indicates required information. Only first name, last name, and suffix will appear in PubMed.

| *First Name and Middle Initial(s) | *Last Name | *Suffix (eg, Jr, III) | Academic Degrees | Institution                                         | Location (city, state/province, country) | Role or Contribution, eg, chair, principal investigator | Group (if more than 1 Group listed in the byline) and/or Subgroup (eg, Steering Committee) |
|-----------------------------------|------------|-----------------------|------------------|-----------------------------------------------------|------------------------------------------|---------------------------------------------------------|--------------------------------------------------------------------------------------------|
| Takeo                             | Nakayama   |                       | MD PhD           | Kyoto University                                    | Kyoto, Japan                             | Project design, data collection and review              |                                                                                            |
| Hiroyasu                          | Iso        |                       | MD PhD           | Osaka University                                    | Suita, Osaka, Japan                      | Project design, data collection and review              |                                                                                            |
| Masayuki                          | Shima      |                       | MD PhD           | Hyogo College of Medicine                           | Nishinomiya, Hyogo, Japan                | Project design, data collection and review              |                                                                                            |
| Hiroshige                         | Nakamura   |                       | MD PhD           | Tottori University                                  | Yonago, Tottori, Japan                   | Project design, data collection and review              |                                                                                            |
| Narufumi                          | Suganuma   |                       | MD PhD           | Kochi University                                    | Nankoku, Kochi, Japan                    | Project design, data collection and review              |                                                                                            |
| Koichi                            | Kusuhara   |                       | MD PhD           | University of Occupational and Environmental Health | Kitakyushu, Fukuoka, Japan               | Project design, data collection and review              |                                                                                            |
| Takahiko                          | Katoh      |                       | MD PhD           | Kumamoto University                                 | Kumamoto, Japan                          | Project design, data collection and review              |                                                                                            |
